# Supplementary material
Source: publisher figshare collection journal article supplement (https://sage.figshare.com/ndownloader/files/21001443)
Supplement: Supplementary file 1 [file 21001443]

## Appendix

**Table A1:** Number of cases and reasons for non-participation by wave

| Wave <i>t</i>                                                                                    | 1     | 2    | 3    | 4    | 5    | 6    |
|--------------------------------------------------------------------------------------------------|-------|------|------|------|------|------|
| Interviews in wave <i>t</i>                                                                      | 12402 | 9069 | 7901 | 6999 | 6261 | 5696 |
| Monotonic cases up to wave <i>t</i>                                                              |       | 9069 | 7383 | 6319 | 5462 | 4832 |
| Permanent dropouts in wave <i>t</i>                                                              |       | 2815 | 1365 | 944  | 781  | 632  |
| Permanent dropouts, excluding hard refusals, deceased, and out-of-scope respondents <sup>1</sup> |       | 2456 | 1236 | 826  | 677  | 547  |
| <i>Non-contact (%)</i>                                                                           |       | 27.6 | 23.3 | 24.1 | 19.4 | 21.8 |
| <i>Soft refusal (%)</i>                                                                          |       | 72.4 | 76.7 | 75.9 | 80.6 | 78.2 |
| Temporary dropouts in wave <i>t</i>                                                              |       | 518  | 321  | 279  | 236  | 169  |
| <i>Non-contact (%)</i>                                                                           |       | 68.7 | 47.4 | 57.7 | 49.2 | 46.7 |
| <i>Soft refusal (%)</i>                                                                          |       | 31.3 | 52.6 | 42.3 | 50.8 | 53.3 |

**Table A2:** Descriptive statistics of wave 1 respondent characteristics by response status up to wave 6

|                            | Continuous participation<br>(N=4832) | Ever temporary dropout<br>(N=1425) | Permanent dropout<br>(N=6145)     |
|----------------------------|--------------------------------------|------------------------------------|-----------------------------------|
| Variables                  | Percent/Mean of observations (SD)    | Percent/Mean of observations (SD)  | Percent/Mean of observations (SD) |
| <i>Relationship status</i> |                                      |                                    |                                   |
| Single                     | 43.1                                 | 41.6                               | 40.1                              |
| Living apart together      | 16.5                                 | 20.2                               | 18.4                              |
| Cohabiting                 | 11.9                                 | 13.8                               | 12.9                              |
| Married                    | 28.5                                 | 24.3                               | 28.6                              |
| At least one child 0-14    | 32.2                                 | 31.9                               | 32.3                              |
| Female                     | 52.5                                 | 54.8                               | 49.7                              |
| Born in East Germany       | 13.8                                 | 13.0                               | 13.3                              |

<sup>1</sup> Reasons for non-participation cannot be determined for hard refusals (i.e. cases that withdraw permission to be re-contacted), as well as for deceased respondents and cases who no longer belong to the target population.

|                                    |            |            |            |
|------------------------------------|------------|------------|------------|
| Home ownership                     | 54.1       | 46.7       | 47.3       |
| Years of education (mean)          | 12.4 (2.7) | 12.4 (2.7) | 11.9 (2.6) |
| <i>Employment status</i>           |            |            |            |
| Full-time                          | 37.2       | 35.9       | 42.2       |
| In education                       | 38.5       | 39.6       | 32.8       |
| Part-time                          | 11.7       | 11.4       | 10.8       |
| Out of labor force                 | 8.7        | 8.4        | 8.7        |
| Unemployed                         | 3.9        | 4.8        | 5.5        |
| <i>Migration status</i>            |            |            |            |
| Non migrant                        | 80.5       | 77.7       | 70.6       |
| 1 <sup>st</sup> generation migrant | 9.1        | 10.7       | 16.4       |
| 2 <sup>nd</sup> generation migrant | 10.4       | 11.7       | 13.0       |
| Match interviewer & respondent sex | 51.4       | 51.3       | 50.2       |
| <i>Degree of urbanization</i>      |            |            |            |
| Rural area                         | 27.0       | 25.6       | 29.2       |
| Periphery                          | 35.8       | 33.5       | 33.2       |
| Urban area                         | 37.2       | 40.9       | 37.6       |
| <i>Age</i>                         |            |            |            |
| 14-15                              | 13.7       | 12.1       | 9.8        |
| 16                                 | 12.3       | 10.8       | 10.9       |
| 17-18                              | 11.6       | 13.3       | 11.9       |
| 24-25                              | 8.4        | 10.0       | 10.7       |
| 26                                 | 9.6        | 12.0       | 11.9       |
| 27-28                              | 10.2       | 12.2       | 12.6       |
| 34 and older                       | 34.2       | 29.6       | 32.2       |

**Table A3:** Multinomial logistic regression on response status up to wave 6, reference group: continuous participation

|                                           | Ever temporary dropout | Permanent dropout |
|-------------------------------------------|------------------------|-------------------|
| <i>Relationship status (ref.: single)</i> |                        |                   |
| Living apart together                     | 0.009<br>(0.009)       | 0.028*<br>(0.013) |
| Cohabiting                                | 0.002<br>(0.011)       | 0.002<br>(0.017)  |
| Married                                   | -0.023*<br>(0.010)     | 0.007<br>(0.017)  |
| At least one child 0-14                   | 0.031**                | -0.032*           |

|                                                  |                    |                     |
|--------------------------------------------------|--------------------|---------------------|
|                                                  | (0.010)            | (0.015)             |
| Female                                           | 0.013*             | -0.021*             |
|                                                  | (0.006)            | (0.010)             |
| Born in East Germany                             | -0.013             | -0.001              |
|                                                  | (0.010)            | (0.014)             |
| Home ownership                                   | -0.016*            | -0.011              |
|                                                  | (0.007)            | (0.010)             |
| Years of education/10 (std)                      | 0.013***           | -0.056***           |
|                                                  | (0.003)            | (0.005)             |
| <i>Employment status (ref.: full-time)</i>       |                    |                     |
| In education                                     | 0.028**            | -0.052**            |
|                                                  | (0.010)            | (0.016)             |
| Part-time                                        | 0.005              | -0.038*             |
|                                                  | (0.010)            | (0.016)             |
| Out of labor force                               | -0.002             | -0.038*             |
|                                                  | (0.012)            | (0.019)             |
| Unemployed                                       | 0.008              | -0.003              |
|                                                  | (0.015)            | (0.023)             |
| <i>Migration status (ref.: non migrant)</i>      |                    |                     |
| 1st generation migrant                           | -0.025**           | 0.151***            |
|                                                  | (0.009)            | (0.014)             |
| 2nd generation migrant                           | -0.010             | 0.084***            |
|                                                  | (0.009)            | (0.014)             |
| Match interviewer & respondent sex               | 0.005              | -0.016 <sup>+</sup> |
|                                                  | (0.006)            | (0.009)             |
| <i>Degree of urbanization (ref.: rural area)</i> |                    |                     |
| Periphery                                        | 0.005              | -0.026*             |
|                                                  | (0.007)            | (0.011)             |
| Urban area                                       | 0.010              | -0.023*             |
|                                                  | (0.008)            | (0.012)             |
| <i>Age (ref.: 34 and older)</i>                  |                    |                     |
| 14-15                                            | 0.006              | -0.094***           |
|                                                  | (0.015)            | (0.024)             |
| 16                                               | -0.001             | -0.058*             |
|                                                  | (0.014)            | (0.024)             |
| 17-18                                            | 0.018              | -0.032              |
|                                                  | (0.014)            | (0.022)             |
| 24-25                                            | 0.014              | 0.025               |
|                                                  | (0.012)            | (0.018)             |
| 26                                               | 0.020 <sup>+</sup> | 0.027               |
|                                                  | (0.012)            | (0.017)             |

|                  |                  |                               |
|------------------|------------------|-------------------------------|
| 27-28            | 0.016<br>(0.011) | 0.028 <sup>+</sup><br>(0.017) |
| Pseudo R-squared | 0.021            |                               |
| Observations     | 11992            |                               |

Average marginal effects; robust standard errors in parentheses

+  $p < 0.10$ , \*  $p < 0.05$ , \*\*  $p < 0.01$ , \*\*\*  $p < 0.001$

**Figure A1:** Life changes reported in the EHC by temporary dropouts and continuous respondents, waves 2-6

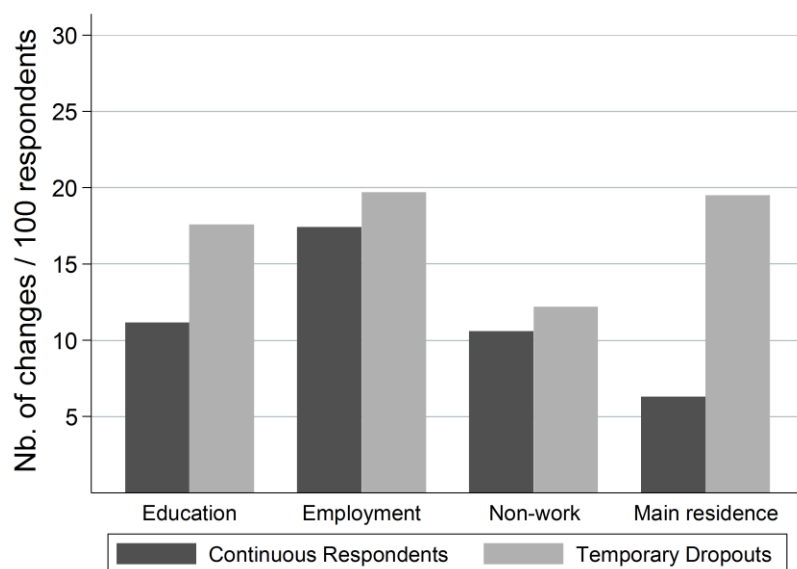

*Notes:* Transitions between each two months in the EHC: End of education, employment, and non-work episodes (regardless of the subsequent status). Note that changes of main residence within the same city are not included, as these are not captured at a monthly basis. Two-sample t-tests indicate that differences in the respective means are significant for transitions in education status (level 0.001), employment status (level 0.05), and changes of main residence (level 0.001).
